# Supplementary material for: Enhancement of intrinsic luminescence by Sb 3+ doped (C 7 H 9 N) 2 CdBr 6 with lone pair 5s 2 electrons
Source: Royal Society of Chemistry journal article supplement (doi:10.1039/d5ce00031a), 2025-01-01
Supplement: d5ce00031a1.pdf [file d5ce00031a1.pdf]

Table S1. ICP tests the molar content of Cd and Sb elements in  $(C_7H_9N)_2CdBr_6 \cdot xSb$

| Feed ratio (%) | ICP-OES measured value<br>(mg/L) |        | The actual molar<br>ratio (%) |
|----------------|----------------------------------|--------|-------------------------------|
| Sb/ (Cd + Sb)  | Cd                               | Sb     | Sb/ (Cd + Sb)                 |
| 1              | 89                               | 0.242  | 0.0027                        |
| 2              | 89.76                            | 0.3874 | 0.0043                        |
| 3              | 88.58                            | 0.5177 | 0.0058                        |
| 4              | 89.03                            | 0.641  | 0.0072                        |
| 5              | 88.275                           | 0.7485 | 0.0084                        |
| 6              | 89.34                            | 1.815  | 0.01                          |

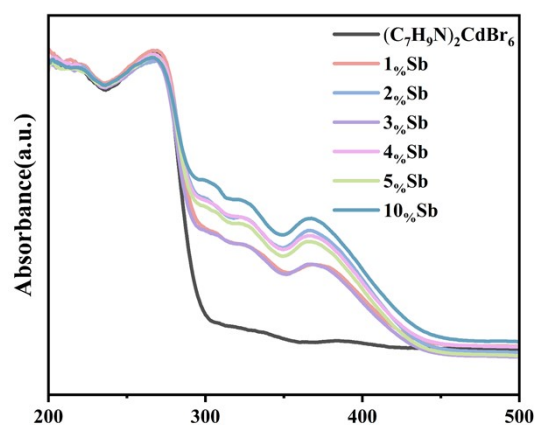

Figure S1 Absorption spectra of  $(C_7H_9N)_2CdBr_6 \cdot xSb$  ( $x = 0.01, 0.02, 0.03, 0.04, 0.05$  and  $0.1$ ) and  $(C_7H_9N)_2CdBr_6$  host.

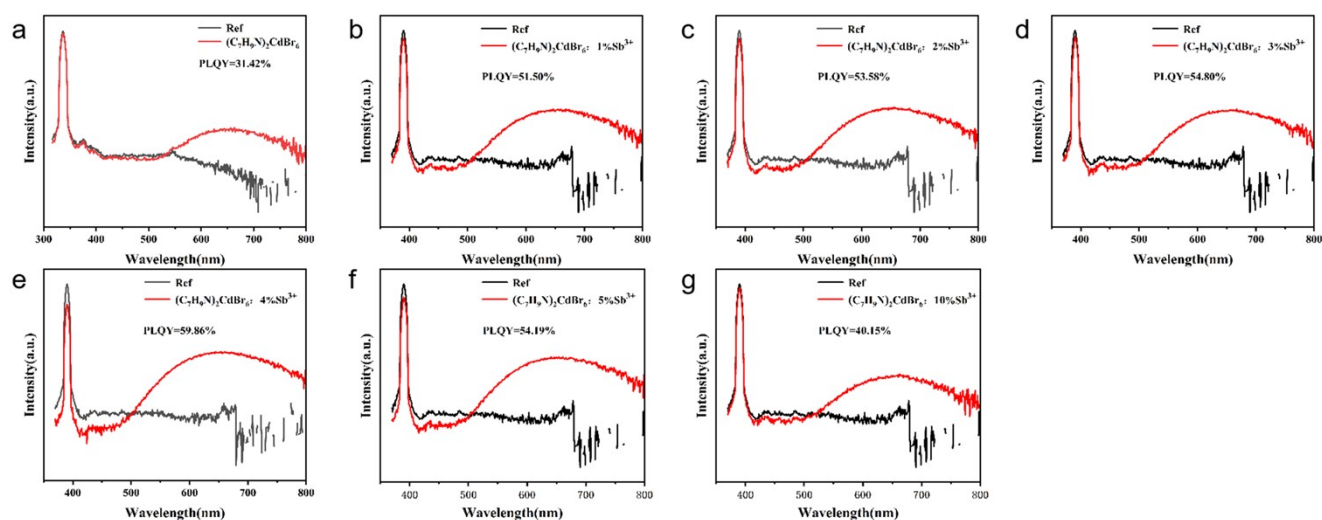

Figure S2 a-g) The PLQY of  $Sb^{3+}$  doped  $(C_7H_9N)_2CdBr_6$  compounds was 0% , 1% ,2% ,3%,4%,5%and10% respectively.

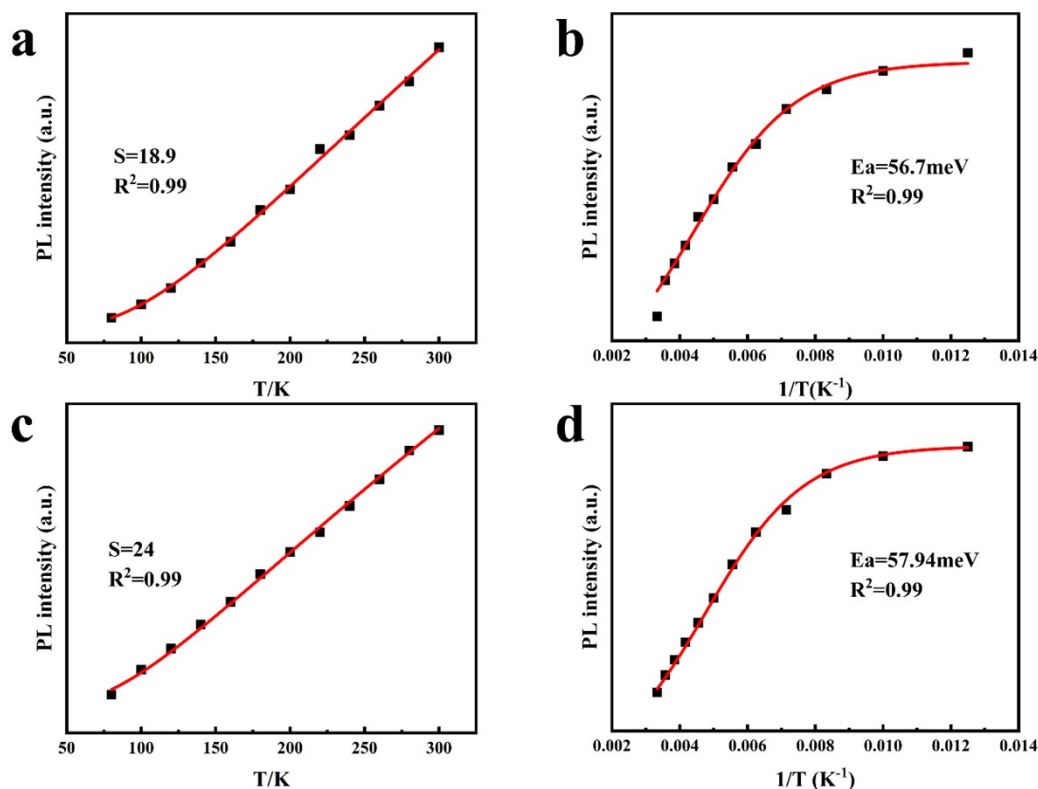

Figure S3 Temperature-dependent FWHM fitted plots of a)  $(\text{C}_7\text{H}_9\text{N})_2\text{CdBr}_6$  and c)  $(\text{C}_7\text{H}_9\text{N})_2\text{CdBr}_6:4\%\text{Sb}$ . Temperature-dependent PL intensity fitted plots of b)  $(\text{C}_7\text{H}_9\text{N})_2\text{CdBr}_6$  and d)  $(\text{C}_7\text{H}_9\text{N})_2\text{CdBr}_6:4\%\text{Sb}$ .

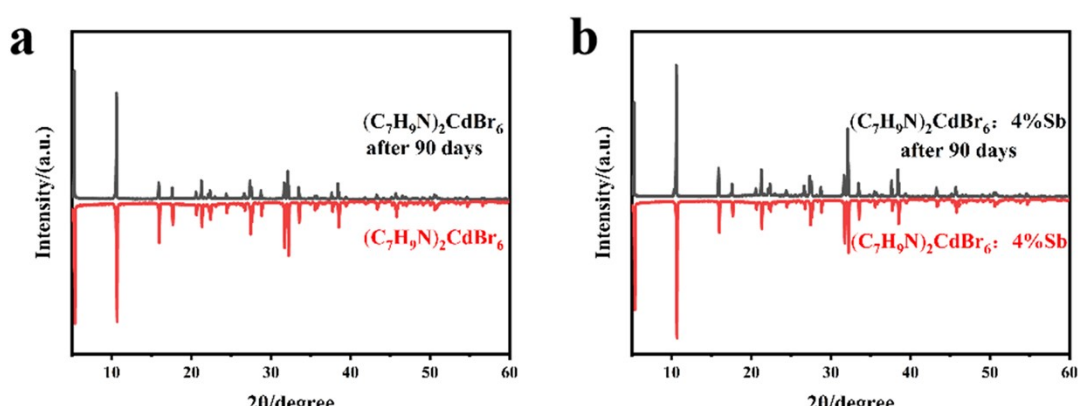

Figure S4 The PXRD of the fresh sample and the sample stored in the air at RT for 90 days of a)  $(\text{C}_7\text{H}_9\text{N})_2\text{CdBr}_6$  and b)  $(\text{C}_7\text{H}_9\text{N})_2\text{CdBr}_6:4\%\text{Sb}$ .

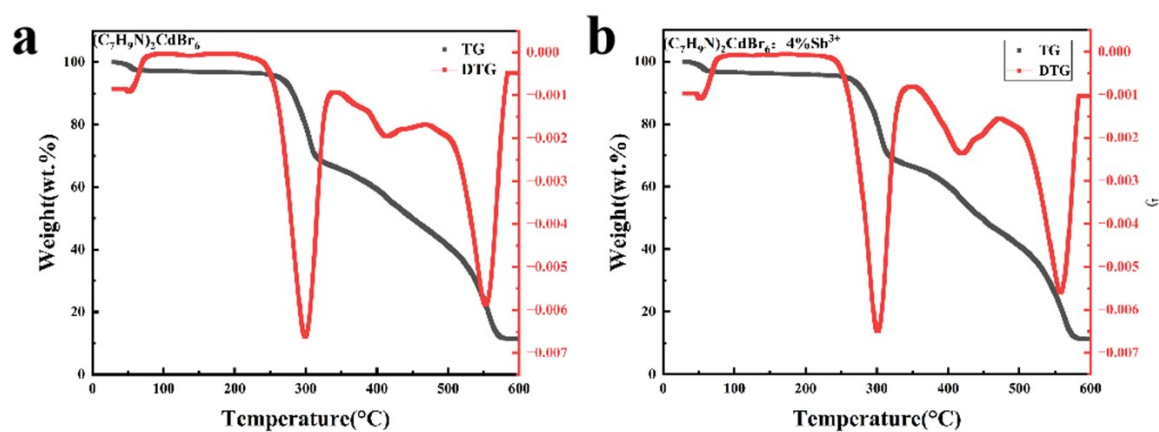

Figure S5 TGA spectra of a)  $(C_7H_9N)_2CdBr_6$  and b)  $(C_7H_9N)_2CdBr_6:4\%Sb$ .

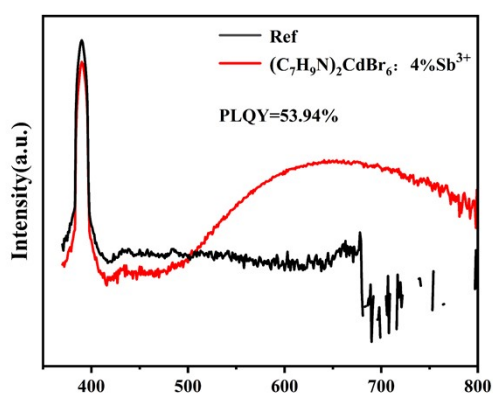

Figure S6 The PLQY of  $(C_7H_9N)_2CdBr_6:4\%Sb$  in the air at RT for 90 days.
